# Supplementary material for: Elevated temperatures dampen the innate immune capacity of developing lake sturgeon (Acipenser fulvescens)
Source: Oxford University Press journal article supplement (doi:10.1242/jeb.245335), 2023-04-27
Supplement: jeb245335supp.pdf [file jeb245335supp.pdf]

## Supplementary Materials and Methods

### Primer Design Methods:

A lake sturgeon head kidney transcriptome was used to design primers for *TLR4*, *NF-kB*, *TNF $\alpha$* , *IL-8*, and *IgM* (Thorstensen et al., 2022b). Annotated lake sturgeon sequences for *TLR4* demonstrated conserved regions with 98.3 and 94.7% identity to the sterlet sturgeon, *Acipenser ruthenus*, and the American paddlefish *Polydon spathula* (Transcripts XM\_034909094.1 and XM\_041234367.1, respectively). Similarly, *NF-kB* and *TNF $\alpha$*  transcripts shared 98 and 98.5% identity, respectively, with published transcripts from the sterlet sturgeon (Transcripts XM\_034013617.2 and XM\_034909934.1, respectively). Lake sturgeon head kidney transcripts annotated as *IL-8* shared 94.8 and 94.5% identity to published transcripts from the Siberian sturgeon, *Acipenser baerii*, and the sterlet sturgeon, respectively (Transcripts MK140599.1 and XM\_034035867.2, respectively). Finally, transcripts annotated as *IgM* shared conserved regions of 96.4, 95.2, 95, 95, and 93.4% identity to previously annotated transcripts from the Siberian sturgeon, beluga sturgeon, *Huso huso*, sterlet sturgeon, Russian sturgeon, *Acipenser gueldenstaedtii*, and Japanese sturgeon, *Acipenser schrenckii*, respectively (Transcripts KC734558.1, DQ257633.1, DQ257636.1, DQ257634.1 and DQ257635.1, respectively).

Primers for *C3* and *TICAM-1* were designed from an annotated and published white sturgeon, liver transcriptome (Doering et al., 2016) while primers for *Lysozyme-C* were designed from a lake sturgeon liver transcriptome (Thorstensen et al., 2022b). Transcripts for both *C3* and *TICAM-1* shared conserved regions with 98% identity to previously annotated transcripts from the sterlet sturgeon (Transcripts XM\_034016062.2 and XM\_034911846.1, respectively). Transcripts for *Lysozyme-C* shared conserved regions with 98.6, 99.4 and 99.1% identity to previously annotated transcripts from the sterlet sturgeon, Chinese sturgeon, *Acipenser sinensis*, and Dabry's sturgeon, *Acipenser dabryanus*, respectively (Transcripts XM\_034058580.2, MF280234.1, MF135537.1, respectively).

A lake sturgeon gill transcriptome was used to design primers for potential reference genes *RPL13a*, *eEF1A1*, and *RPL4* (Thorstensen et al., 2022b; Bugg et al., 2022). Transcripts for *RPL13a* shared conserved regions with both sterlet sturgeon and the American paddlefish, 98.6 and 96% identity, respectively (Transcripts XM\_034908381.1 and XM\_041240517.1, respectively). Similarly, transcripts for *eEF1A1* shared conserved regions with the sterlet sturgeon, American

paddlefish, and additionally Dabry's sturgeon, with identities of 96.4, 95.4, and 98.4%, respectively (Transcripts XM\_034915679.1, XM\_041240787.1 and MH790258.1, respectively). Finally, transcripts annotated as *RPL4* shared conserved regions with previously annotated transcripts from the Siberian sturgeon, sterlet sturgeon, and American paddlefish, with identities of 99.8, 99.4 and 97.2%, respectively (Transcripts MG722839.1, XM\_034049385.2 and XM\_041218712.1, respectively).

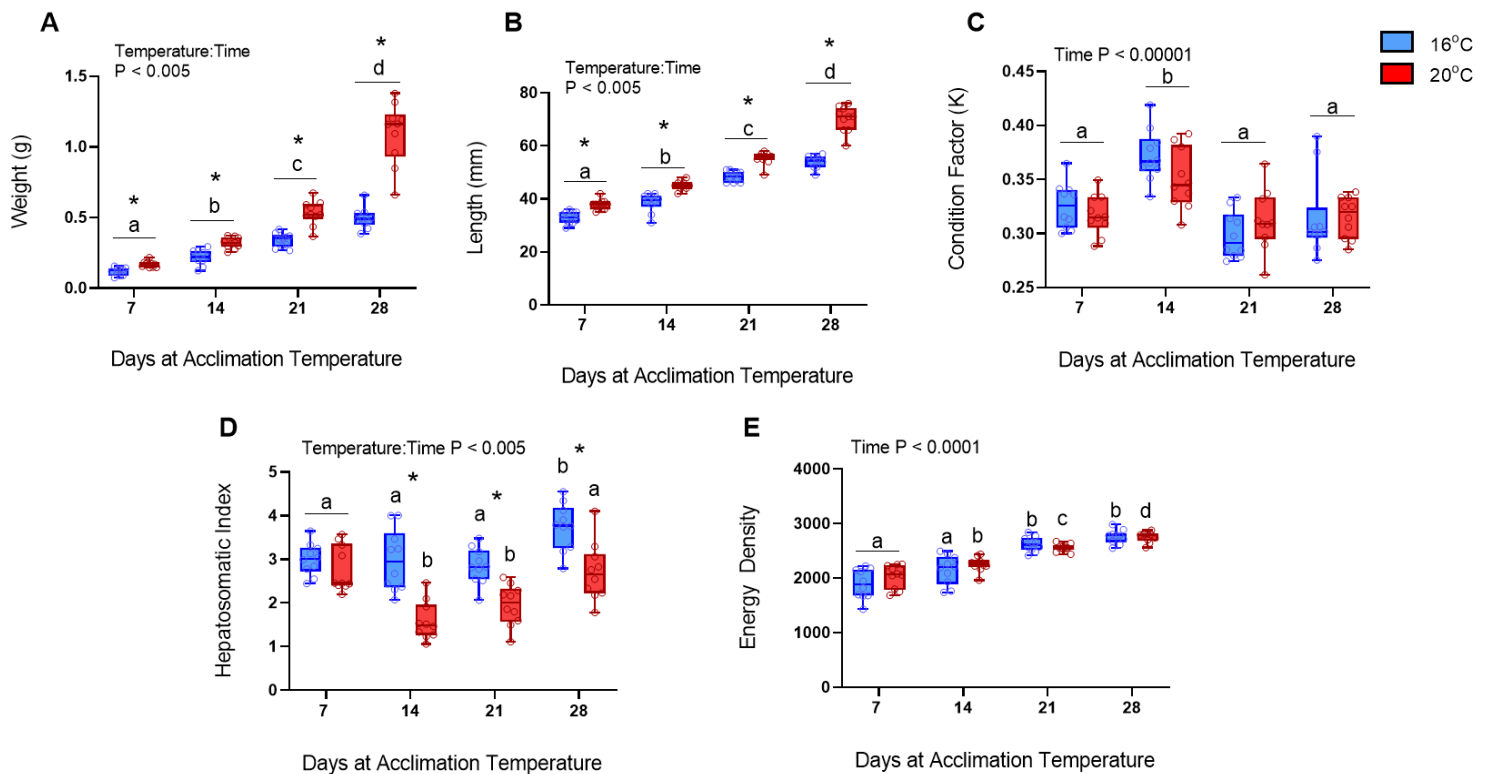

**Fig. S1.** A) Weight (g), B) length (mm), C) condition factor (K), D) hepatosomatic index (HSI), and E) energy density of developing lake sturgeon, *Acipenser fulvescens*, throughout 28 days acclimation to 16 and 20°C. Differences between treatments and timepoints were determined by two-factor ANOVA ( $P < 0.05$ ) followed by Tukey's honestly significant different post-hoc test. \*'s represent significance between 16 and 20°C acclimation treatments. Lowercase letters a, b, c represent significance between timepoints, within an acclimation treatment. ( $P < 0.05$ ; two-factor ANOVA). Data are expressed as mean  $\pm$  SEM (n = 10).

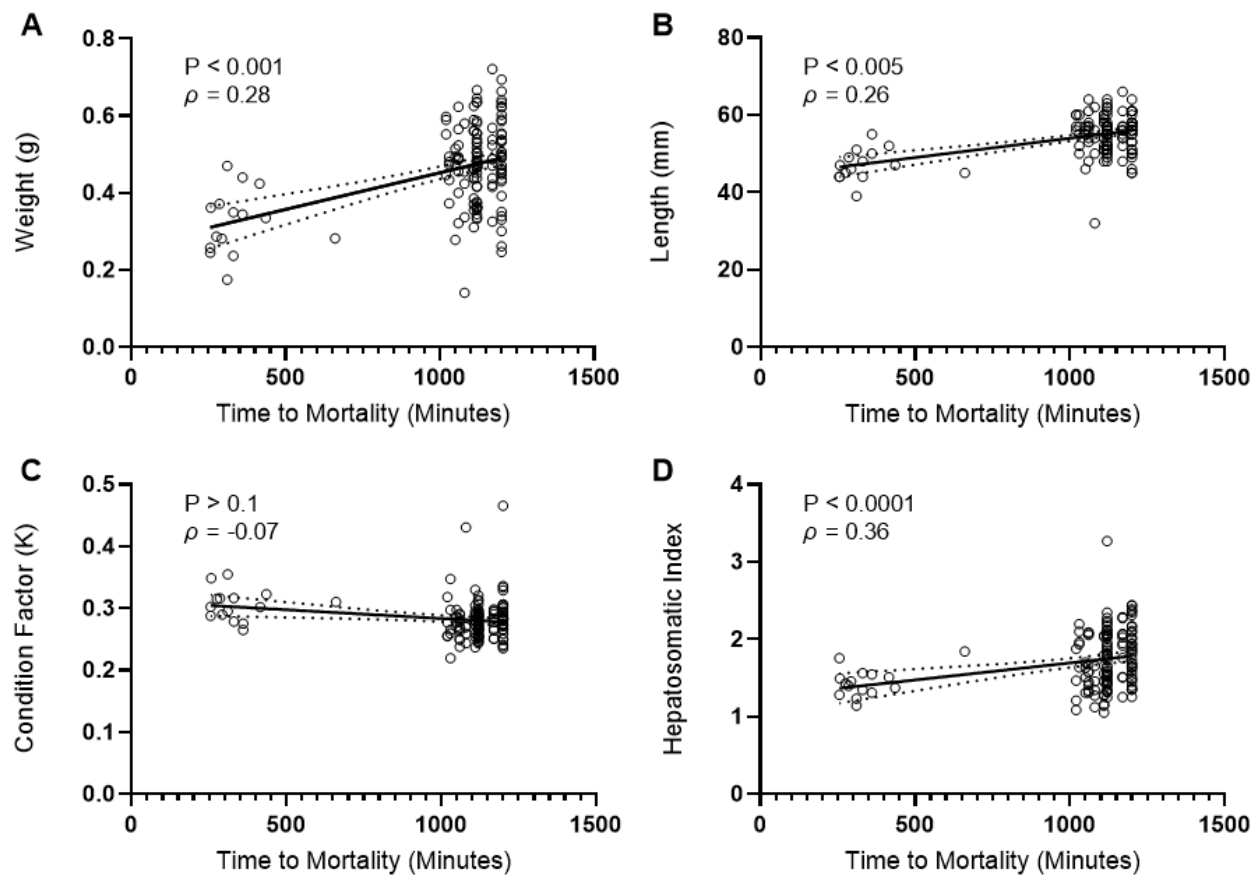

**Fig. S2.** The relationship between A) weight (g), B) length (mm), C) condition factor (K) and D) hepatosomatic index (HSI) and time to mortality of 20°C acclimated developing lake sturgeon, *Acipenser fulvescens*, following exposure to 60  $\mu\text{g.ml}^{-1}$  lipopolysaccharides. Significance was determined by Spearman's correlation. The solid line throughout the graph represents the best fit straight line surrounded by dotted lines representing the 95% confidence interval. Open circles represent individual lake sturgeon (n = 142).

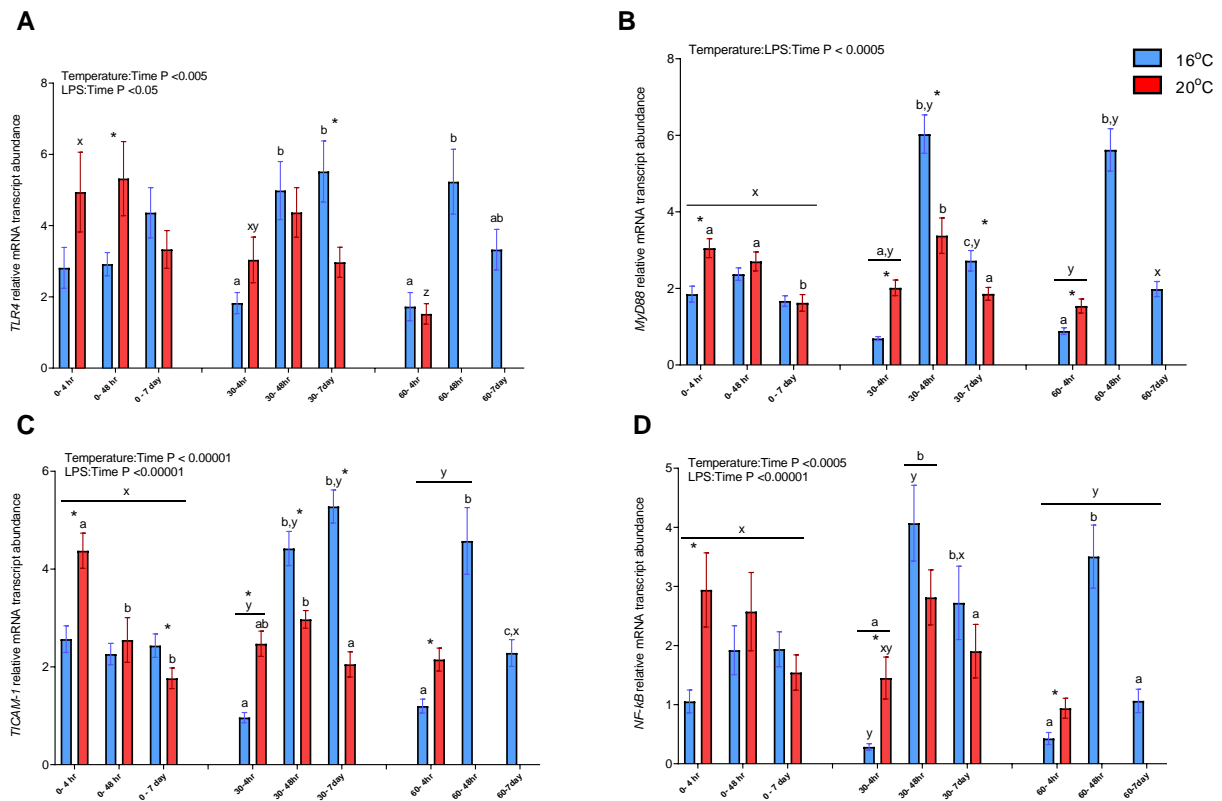

**Fig. S3. Whole-body mRNA transcript abundance of genes involved in pathogen detection A) Toll-like Receptor 4, B) MyD88, C) TICAM-1, and D) NF-κB in developing lake sturgeon, *Acipenser fulvescens*, acclimated to 16 and 20°C and then exposed to 0, 30, and 60 µg.ml<sup>-1</sup> of bacterial lipopolysaccharides, over a timeseries of 4 h exposure, 48 h exposure, and following a 7-day lipopolysaccharides-free recovery. Asterisks represent significance between acclimation treatments. Lowercase letters a, b, c represent significance between timepoints, within an exposure concentration and timepoint. Lowercase letters x, y, z represent significance in a given timepoint and acclimation temperature, throughout exposure concentrations (P < 0.05; three-factor ANOVA). Data are expressed as +/- SEM (n = 8-10).**

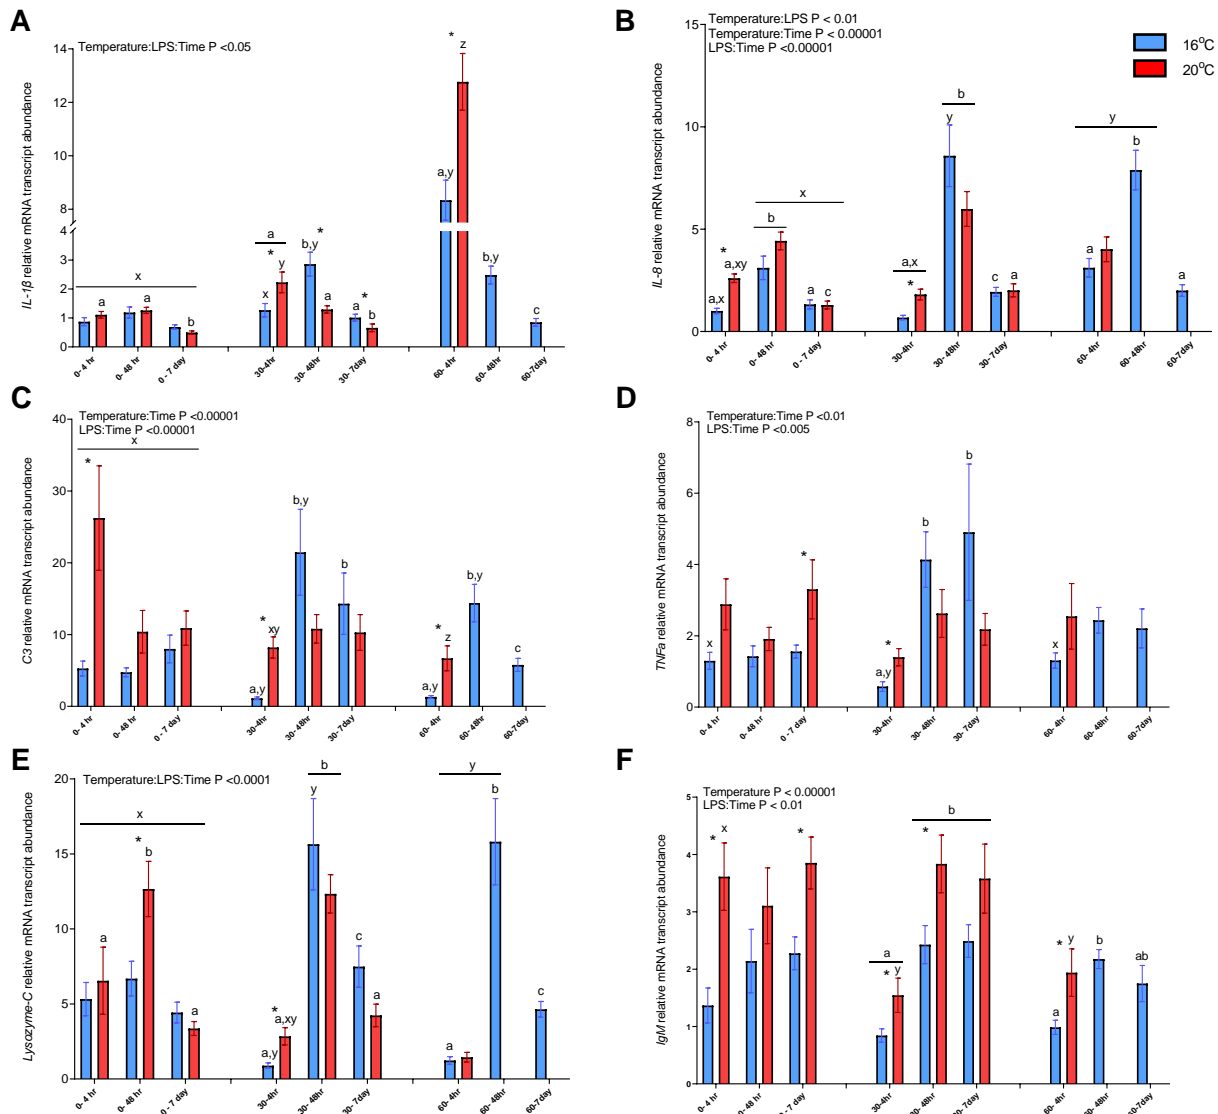

**Fig. S4. Whole-body mRNA transcript abundance of genes involved in the innate immune response** A) *IL-1 $\beta$* , B) *IL-8*, C) *C3*, D) *TNF $\alpha$* , E) *Lysozyme-C*, and F) *IgM* in developing lake sturgeon, *Acipenser fulvescens*, acclimated to 16 and 20°C and then exposed to 0, 30, and 60  $\mu\text{g.ml}^{-1}$  of bacterial lipopolysaccharides, over a timeseries of 4 h exposure, 48 h exposure, and following a 7-day lipopolysaccharides-free recovery. Asterisks represent significance between acclimation treatments. Lowercase letters a, b, c represent significance between timepoints, within an exposure concentration and timepoint. Lowercase letters x, y, z represent significance in a given timepoint and acclimation temperature, throughout exposure concentrations ( $P < 0.05$ ; three-factor ANOVA). Data are expressed as  $\pm$  SEM ( $n = 9-10$ ).

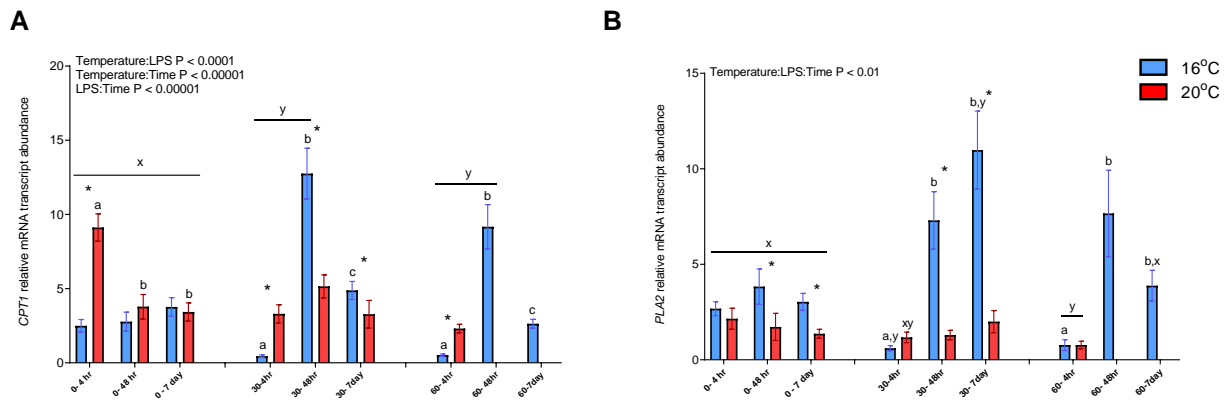

**Fig. S5. Whole-body mRNA transcript abundance of genes involved in the fatty acid response**  
 A) *CPT1* and B) *PLA2* in developing lake sturgeon, *Acipenser fulvescens*, acclimated to 16 and 20°C and then exposed to 0, 30, and 60  $\mu\text{g.ml}^{-1}$  of bacterial lipopolysaccharides, over a timeseries of 4 h exposure, 48 h exposure, and following a 7-day lipopolysaccharides-free recovery. Asterisks represent significance between acclimation treatments. Lowercase letters a, b, c represent significance between timepoints, within an exposure concentration and timepoint. Lowercase letters x, y, z represent significance in a given timepoint and acclimation temperature, throughout exposure concentrations ( $P < 0.05$ ; three-factor ANOVA). Data are expressed as  $\pm$  SEM ( $n = 8-10$ ).

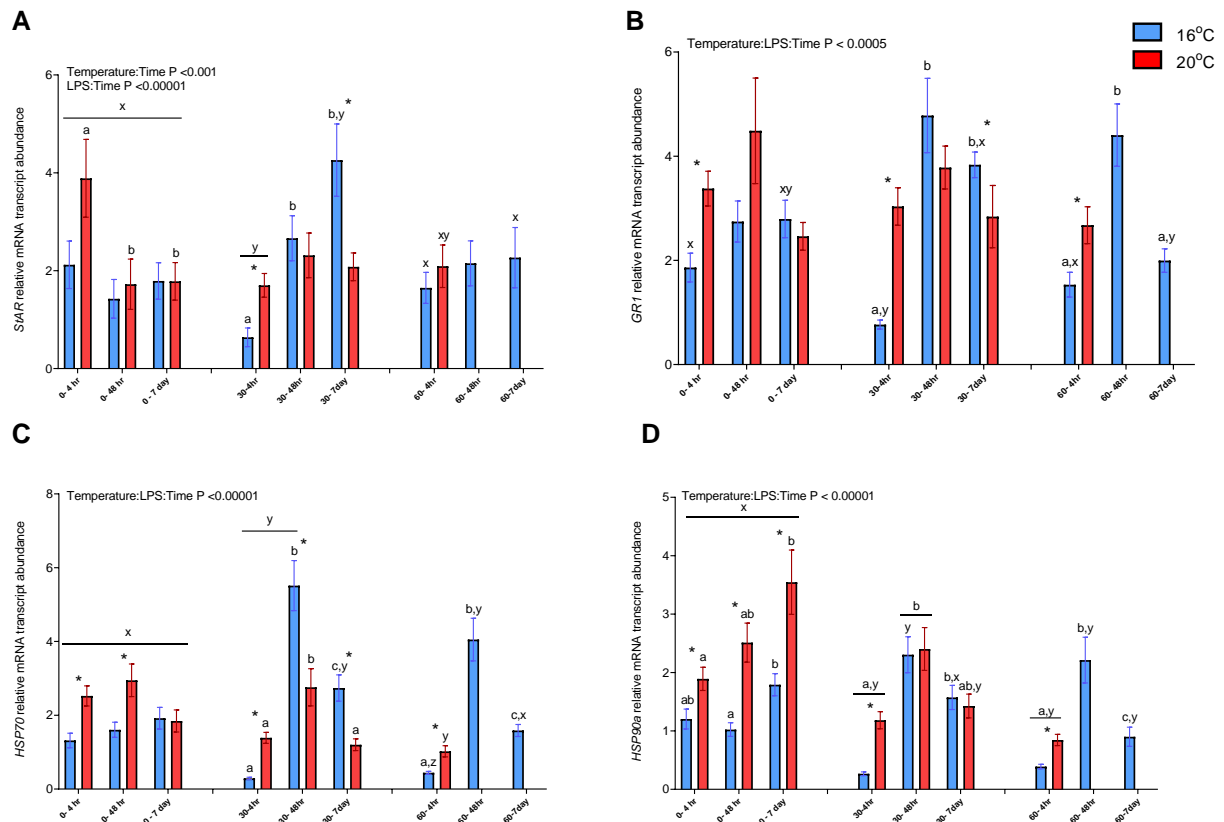

**Fig. S6. Whole-body mRNA transcript abundance of genes involved in the glucocorticoid stress response** A) *StAR*, B) *GR1*, C) *HSP70*, D) *HSP90a* in developing lake sturgeon, *Acipenser fulvescens*, acclimated to 16 and 20°C and then exposed to 0, 30, and 60 µg.ml<sup>-1</sup> of bacterial lipopolysaccharides, over a timeseries of 4 h exposure, 48 h exposure, and following a 7 day lipopolysaccharides-free recovery. Asterisks represent significance between acclimation treatments. Lowercase letters a, b, c represent significance between timepoints, within an exposure concentration and timepoint. Lowercase letters x, y, z represent significance in a given timepoint and acclimation temperature, throughout exposure concentrations (P < 0.05; three-factor ANOVA). Data are expressed as +/- SEM (n = 7-10).



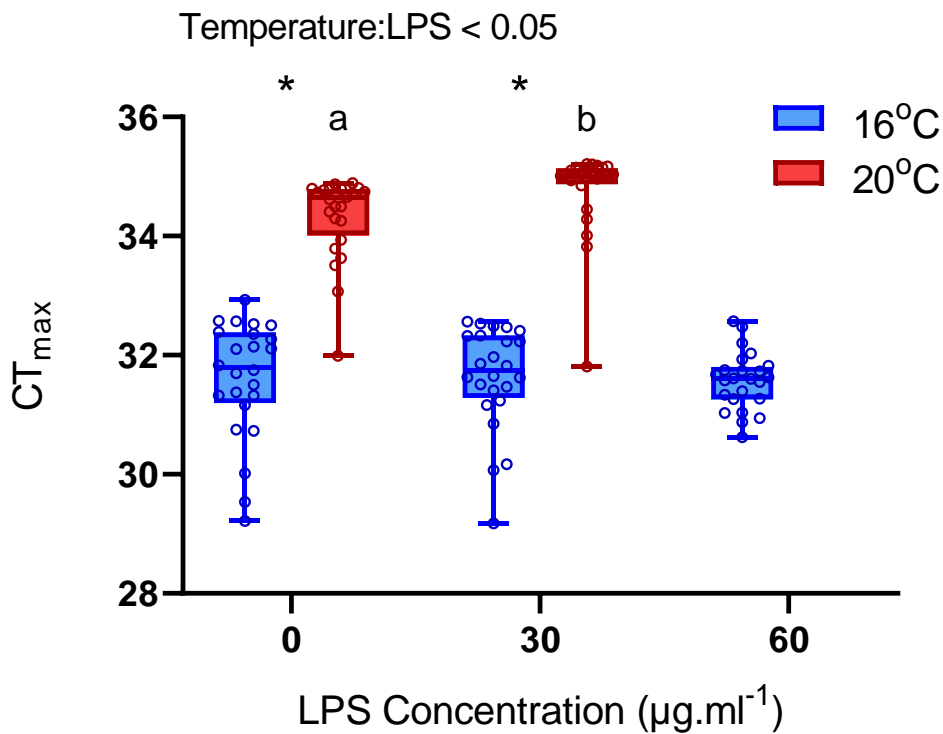

**Fig. S7.** Critical thermal maximum ( $CT_{\max}$ ) of 16 and 20°C acclimated developing lake sturgeon, *Acipenser fulvescens*, following a 7-day recovery from 48 h exposure trials in lipopolysaccharide concentrations of 0, 30, and 60  $\mu\text{g}.\text{ml}^{-1}$ . Differences between treatments were determined by two-factor ANOVA ( $P < 0.05$ ) followed by Tukey's honestly significant different post-hoc test. \*'s represent significance between 16 and 20°C acclimation treatments within a lipopolysaccharide exposure concentration. Lowercase letters a and b represent significance across treatment concentrations within a single acclimation treatment ( $n = 24$ ).

#### Table S1.

[Click here to download Table S1](#)
